# Supplementary material for: Water-stable organic field-effect transistors based on naphthodithieno[3,2-b]thiophene derivatives
Source: Royal Society of Chemistry journal article supplement (doi:10.1039/c8tc04999h), 2018-11-29
Supplement: c8tc04999h1.pdf [file c8tc04999h1.pdf]

## Water-stable organic field-effect transistors based on naphthodithieno[3,2-*b*]thiophene derivatives

Chenyu Li,<sup>†ab</sup> Ji Zhang,<sup>†a</sup> Zhaoguang Li,<sup>c</sup> Weifeng Zhang,<sup>a</sup> Man Shing Wong<sup>\*c</sup> and Gui Yu<sup>\*ab</sup>

<sup>a</sup>Beijing National Laboratory for Molecular Sciences, CAS Research/Education Center for Excellence in Molecular Sciences, Institute of Chemistry, Chinese Academy of Sciences, Beijing 100190, P. R. China.

E-mail: yugui@iccas.ac.cn

<sup>b</sup>School of Chemical Sciences, University of Chinese Academy of Sciences, Beijing 100049, P. R. China

<sup>c</sup>Institute of Molecular Functional Materials, Department of Chemistry, and Institute of Advanced Materials, Hong Kong Baptist University, Kowloon Tong, Hong Kong SAR, P. R. China.

E-mail: mswong@hkbu.edu.hk

<sup>†</sup>These authors contributed equally to this work.

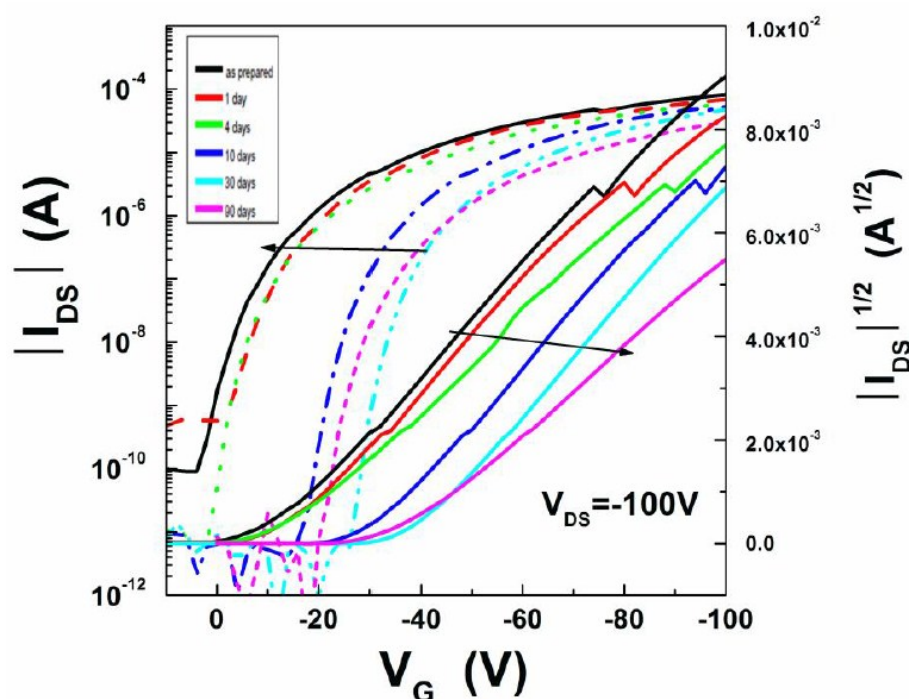

**Fig. S1** Transfer characteristics of the OFET devices based on NDTT-8 after different times placed in air.

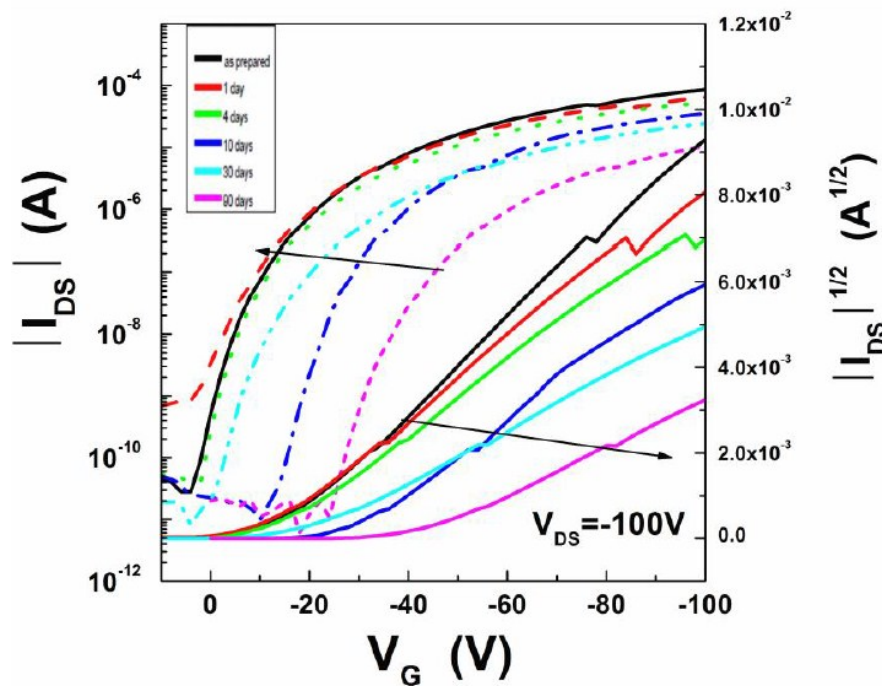

Fig. S2 Transfer characteristics of the OFET devices based on NDTT-8 after different times placed in water vapor.

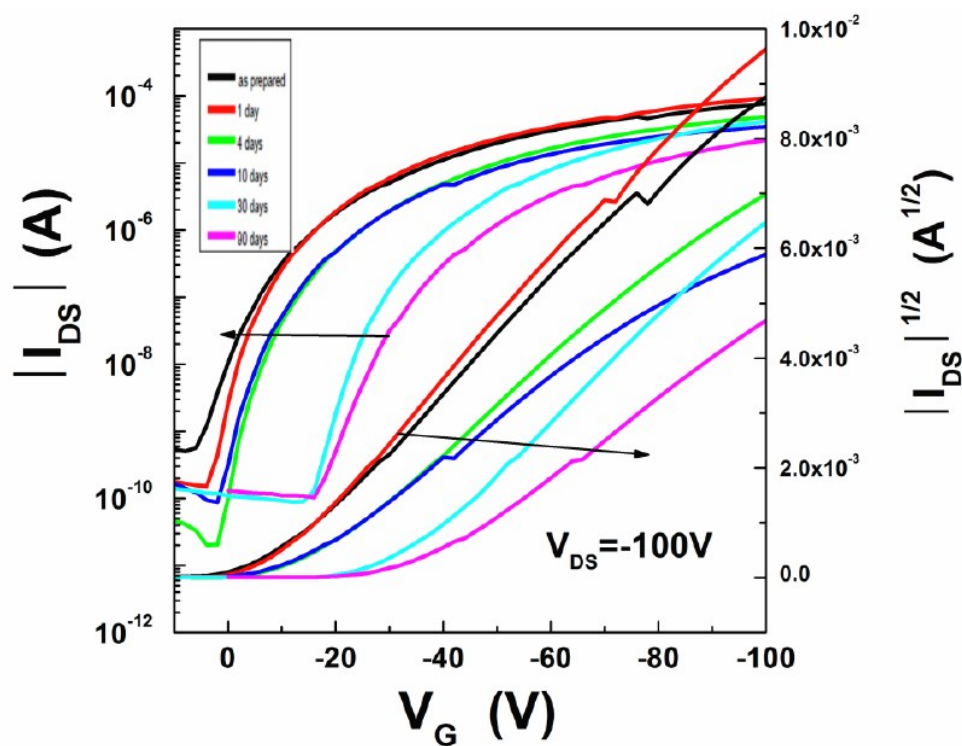

Fig. S3 Transfer characteristics of the OFET devices based on NDTT-8 after different times placed in water.

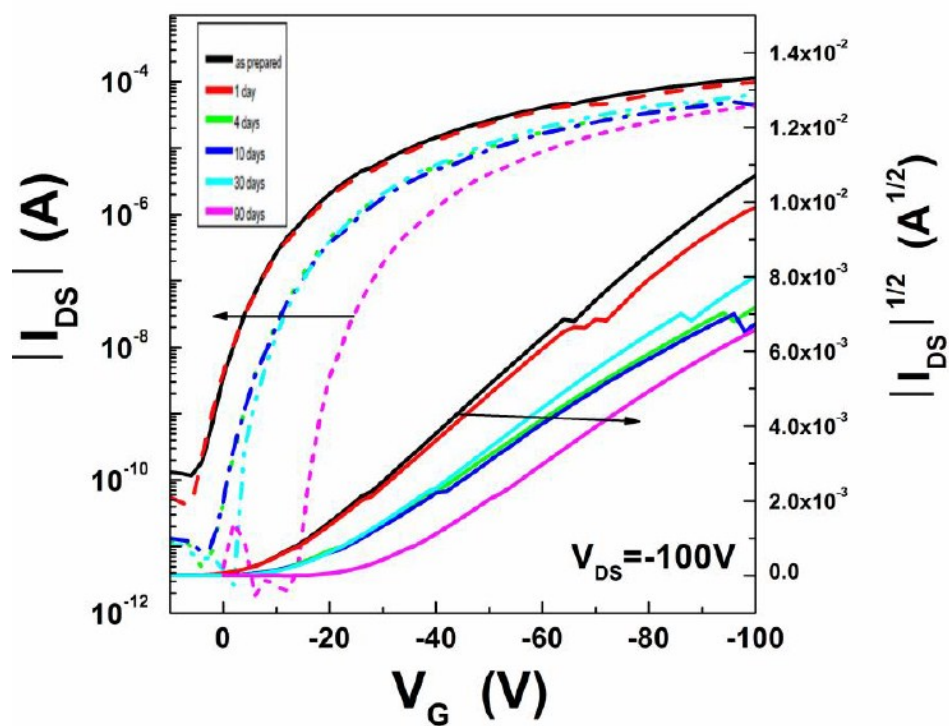

Fig. S4 Transfer characteristics of the OFET devices based on NDTT-10 after different times placed in air.

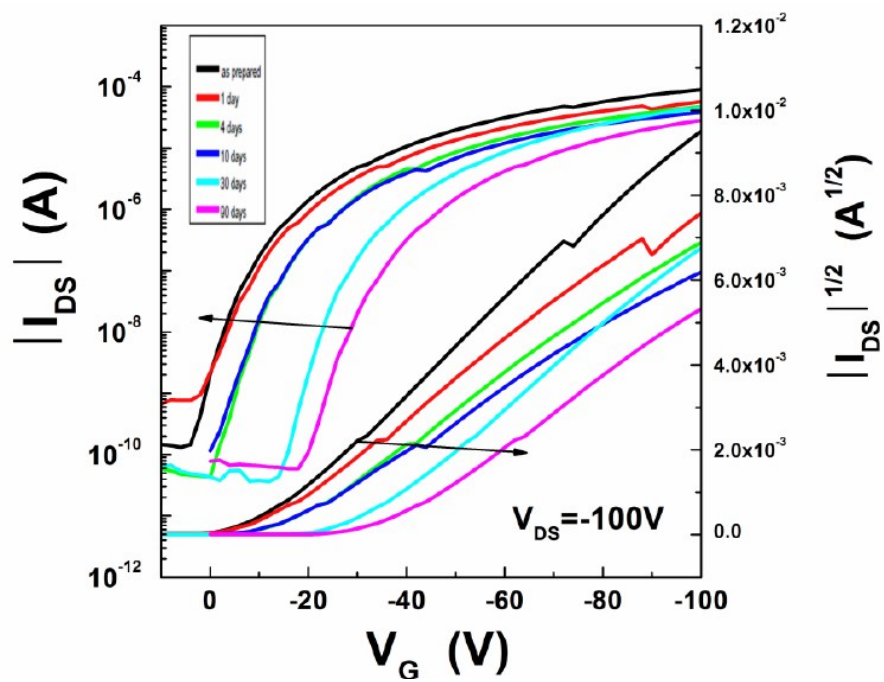

Fig. S5 Transfer characteristics of the OFET devices based on NDTT-10 after different times placed in water vapor.

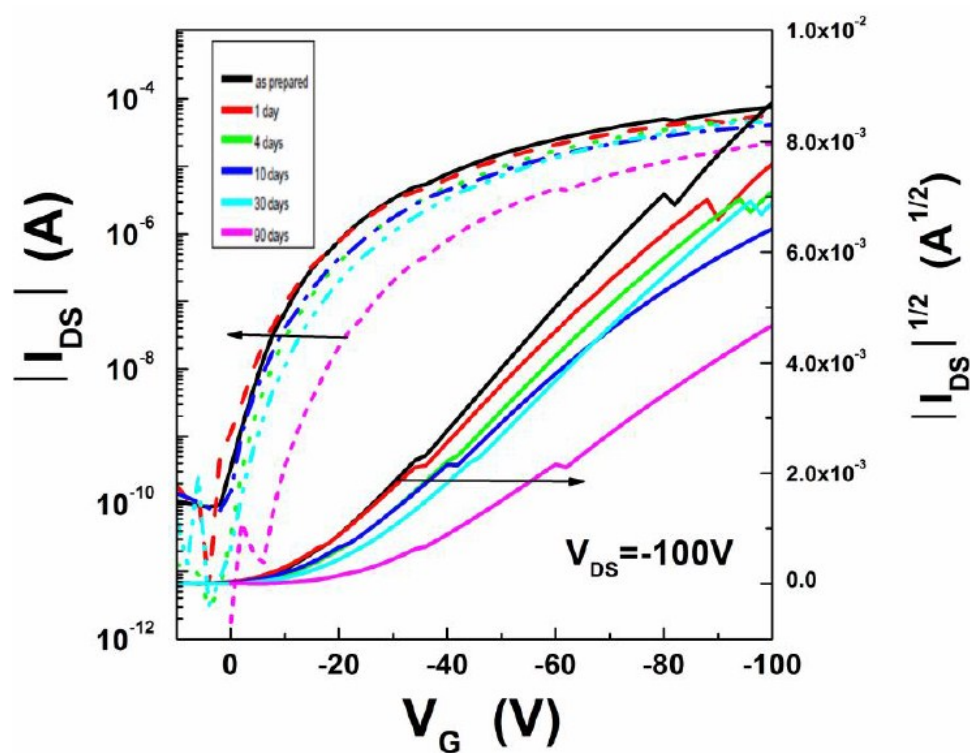

Fig. S6 Transfer characteristics of the OFET devices based on NDFT-10 after different times placed in water.

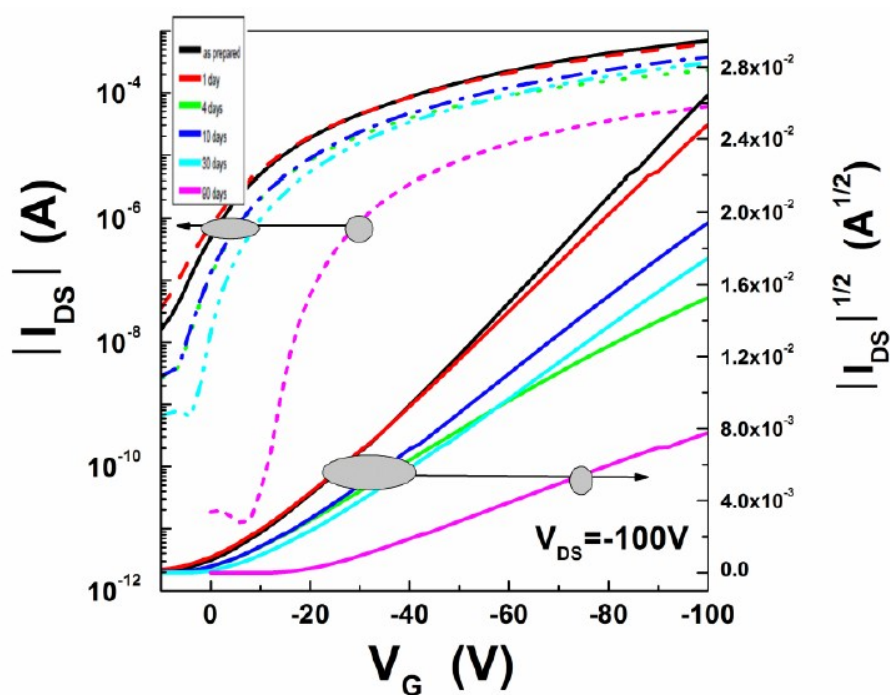

Fig. S7 Transfer characteristics of the OFET devices based on pentacene after different times placed in air.

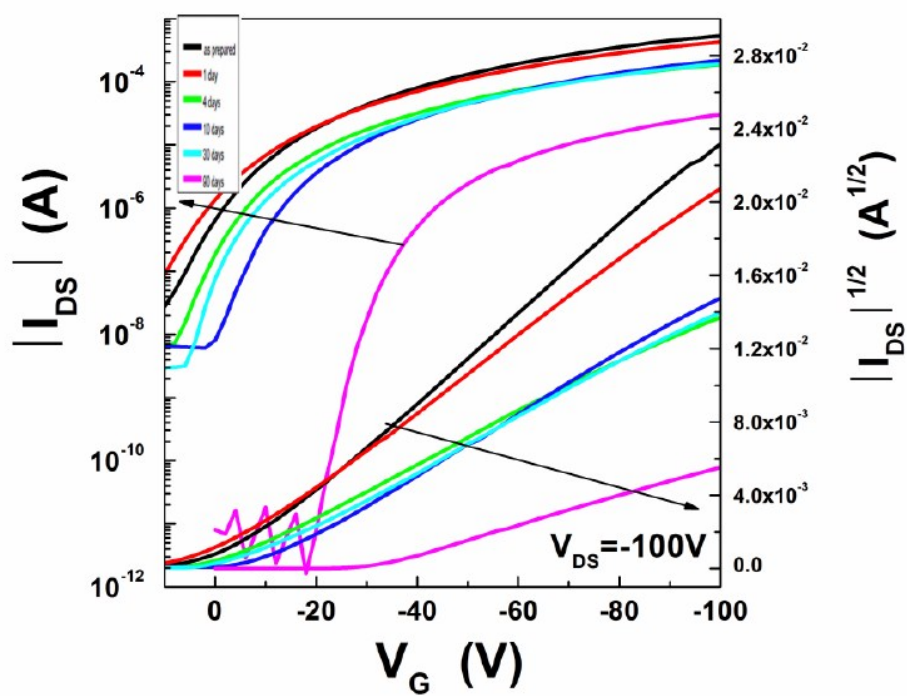

Fig. S8 Transfer characteristics of the OFET devices based on pentacene after different times placed in water vapor.

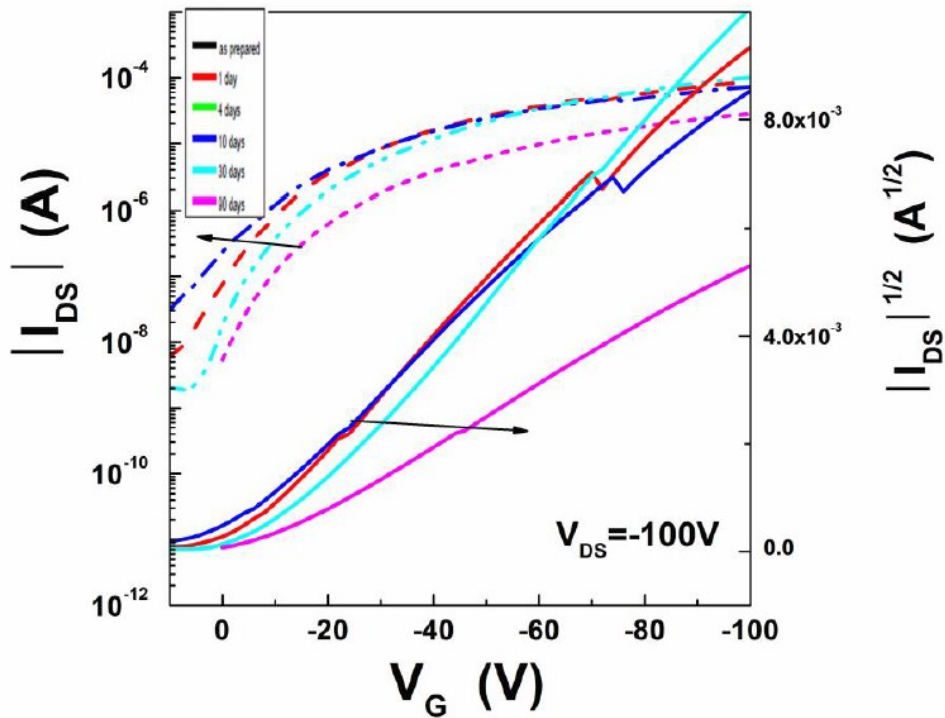

Fig. S9 Transfer characteristics of the OFET devices based on pentacene after different times placed in water.



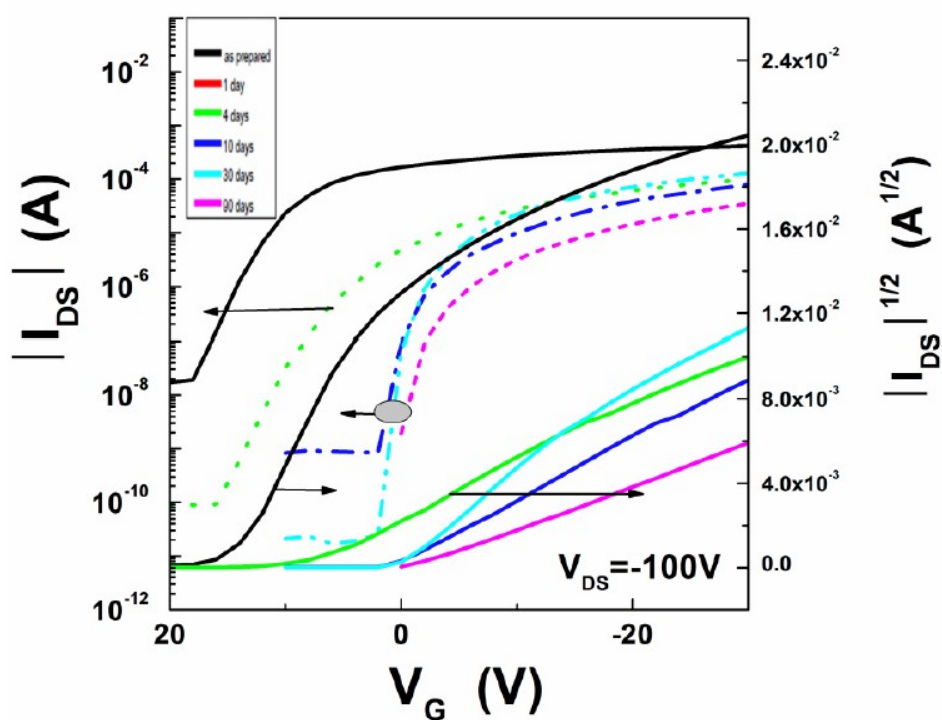

Fig. S10 Transfer characteristics of the OFET devices based on PDVT-10 after different times placed in air.

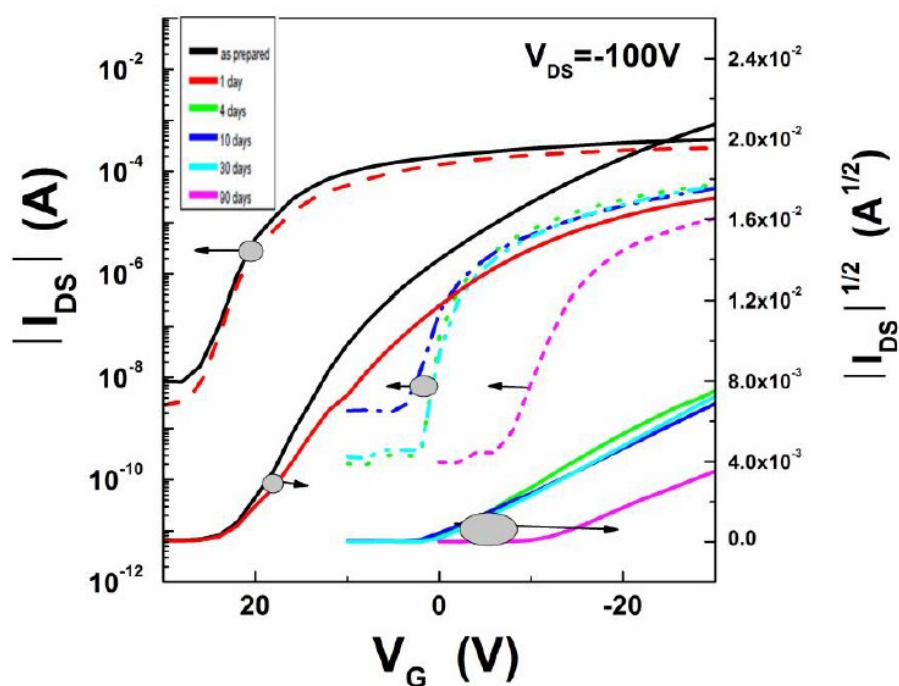

Fig. S11 Transfer characteristics of the OFET devices based on PDVT-10 after different times placed in water vapor.

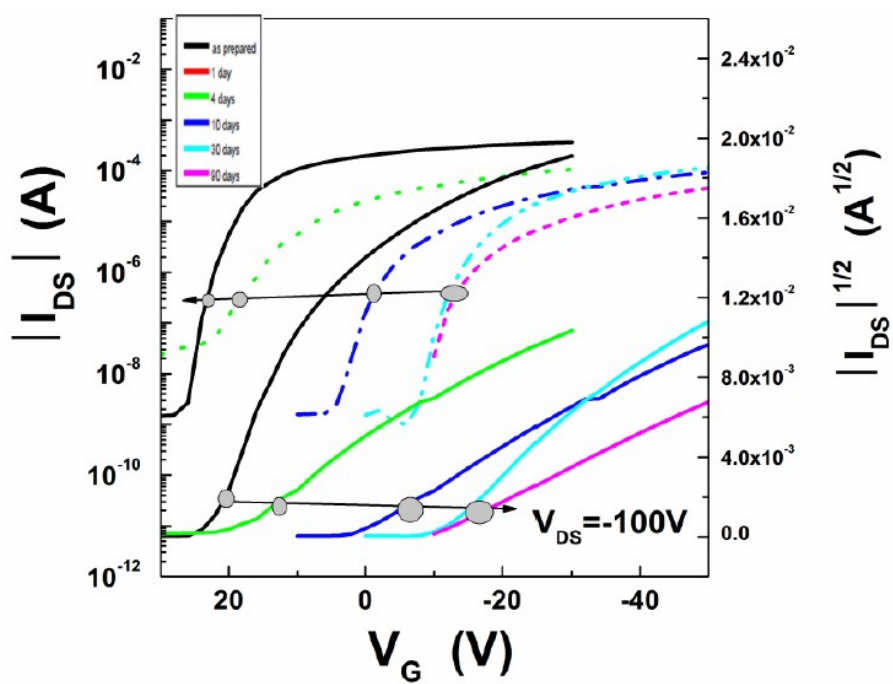

Fig. S12 Transfer characteristics of the OFET devices based on PDVT-10 after different times placed in water.
